# Supplementary material
Source: Royal Society of Chemistry journal article supplement (doi:10.1039/d6ta01262k)
Supplement: d6ta01262k1.pdf [file d6ta01262k1.pdf]

## Supporting Information

# Constructing Rigid–Flexible Robust Silicone Aerogels via Hyperconnected POSS Networks for Extreme Thermal Protection

*Aoqing Yan, <sup>a, b</sup> Guixiang Li, <sup>b, \*</sup> Yi Luo, <sup>b, \*</sup> Bing Han, <sup>a</sup> Zhe Su, <sup>b</sup> Hao Tian, <sup>a</sup>*

*Bo Niu <sup>a</sup> and Donghui Long <sup>a, b, \*</sup>*

<sup>a</sup> Key Laboratory of Specially Functional Polymeric Materials and Related Technology (Ministry of Education), School of Chemical Engineering, East China University of Science and Technology, Shanghai 200237, China.

<sup>b</sup> Suzhou National Laboratory, No.388, Ruoshui Street, SIP, Jiangsu 215123, China

\* Corresponding author: [longdh@mail.ecust.edu.cn](mailto:longdh@mail.ecust.edu.cn) (D.H. Long),  
[liguixiang1998@163.com](mailto:liguixiang1998@163.com) (G.F. Li), and [sosolyi@163.com](mailto:sosolyi@163.com) (Y. Luo)

## Part A: Detailed information of ablation test

Here, the size of ablation specimen was  $\Phi 30 \times 10$  mm. The tests were performed with 5 parallel specimens to ensure statistical significance. A K-type thermocouple was utilized to record thermal responses on the backside surfaces. The linear ablation rate ( $R_l$ ) and mass ablation rate ( $R_m$ ) were calculated by employing the following formulas:

$$R_l = (l_0 - l_t) / t \quad \backslash * \text{MERGEFORMAT (1)}$$

$$R_m = (m_0 - m_t) / t \quad \backslash * \text{MERGEFORMAT (2)}$$

Where  $l_0$  and  $m_0$  represents the thickness and mass before ablation,  $l_t$  and  $m_t$  represents the thickness and mass after ablation, and  $t$  is the ablation time.<sup>1</sup>

## Part B: Supplementary Figures and Tables

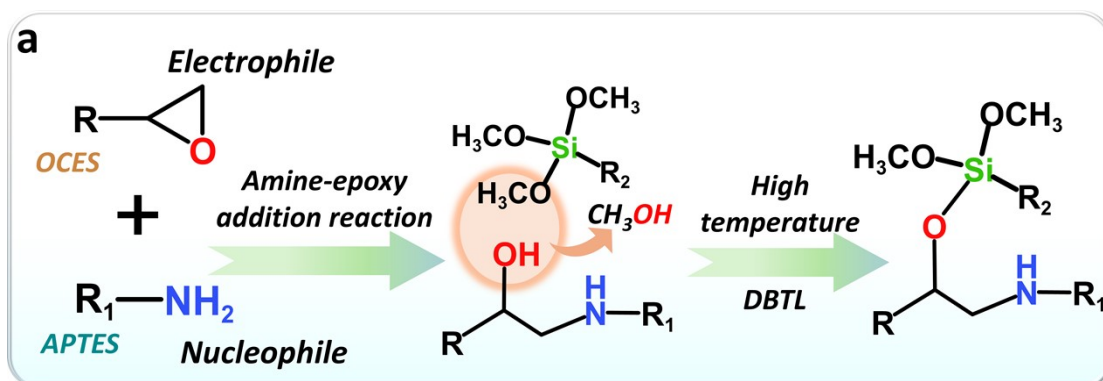

Fig. S1 Schematic of the synthesis route for POSS-SAE.

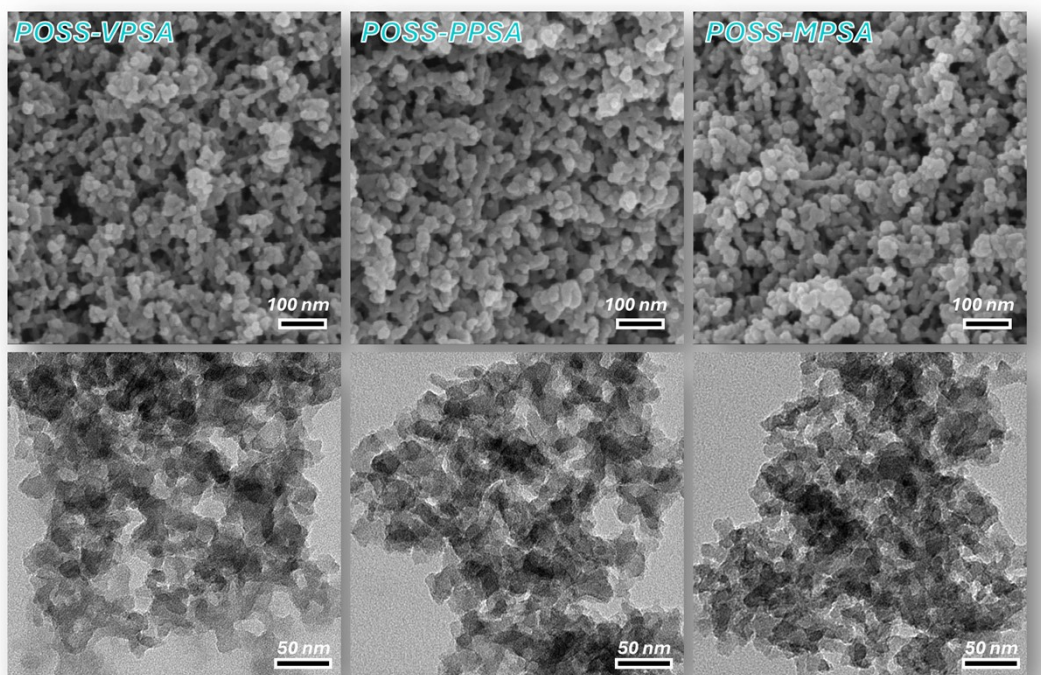

Fig. S2 SEM and TEM images of POSS-PSAs.

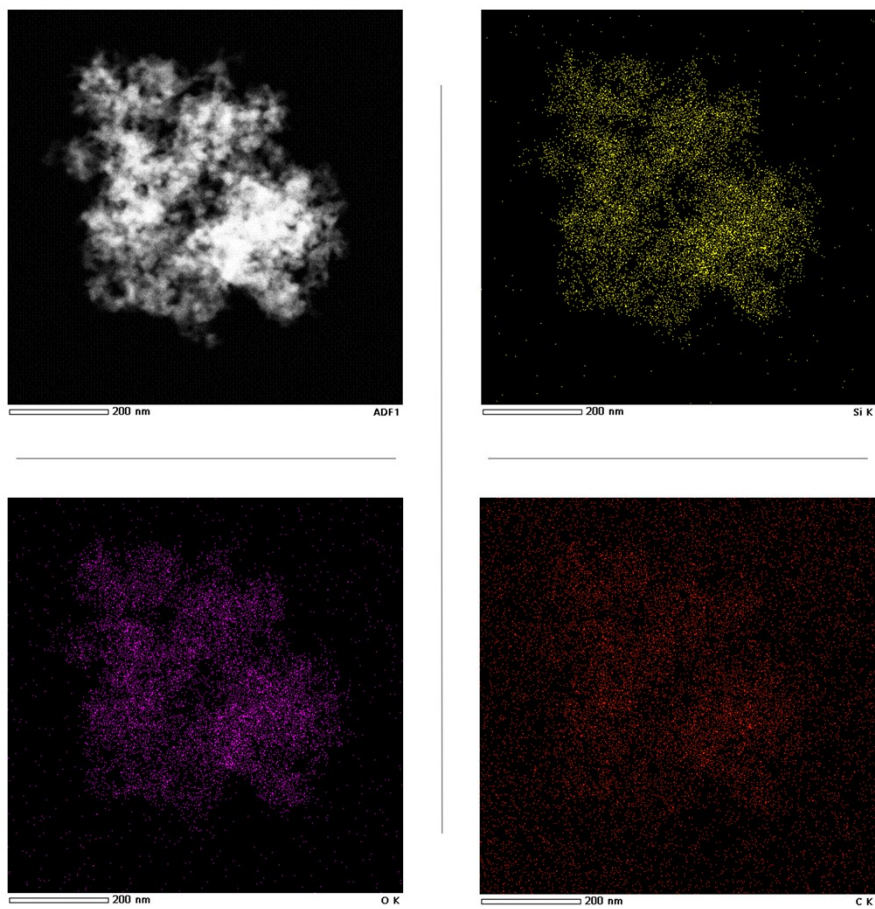

Fig. S3 Elemental mapping of POSS-VPSA.

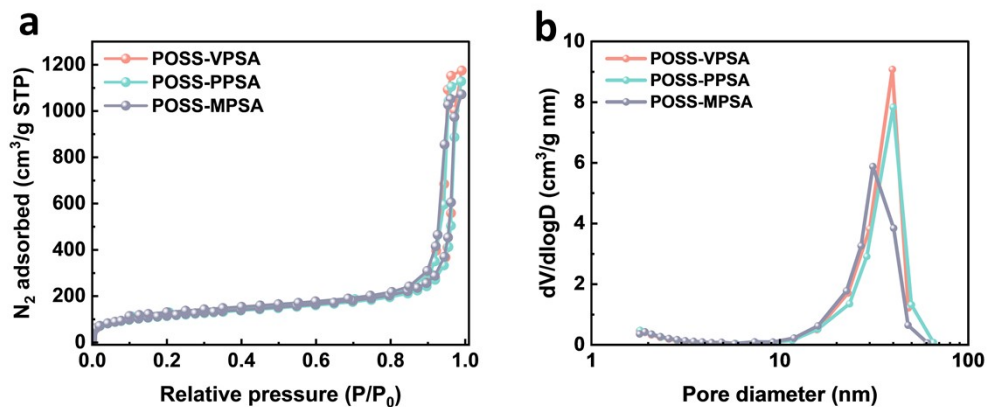

Fig. S4 BET Analysis Results of the POSS-PSAs. (a)  $N_2$  adsorption/desorption isotherms. (b) Pore size distribution.

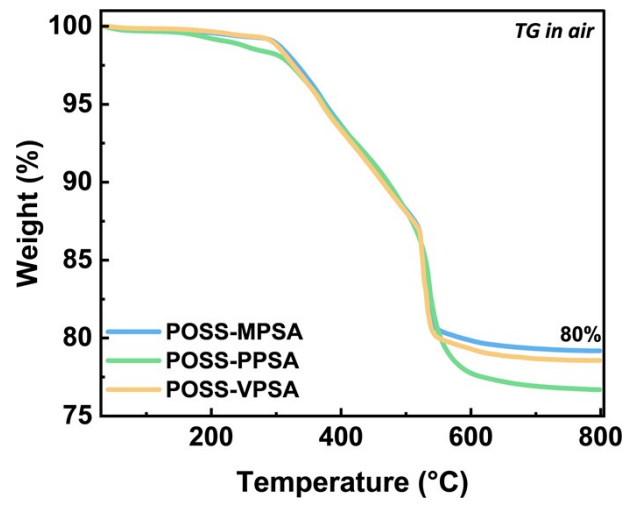

Fig. S5 TG curves of POSS-PSAs under air atmosphere.

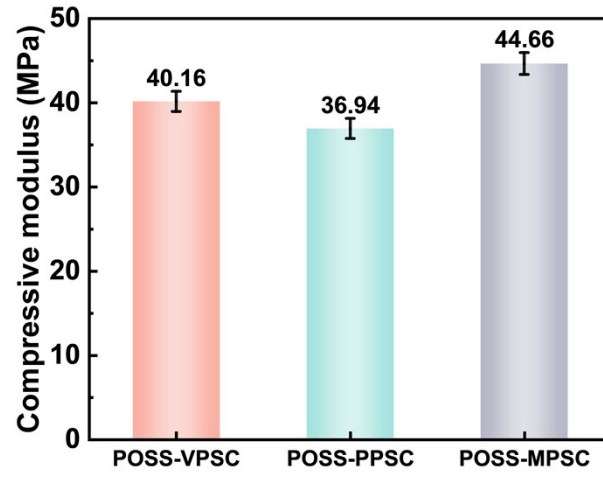

Fig. S6 Compressive modulus of POSS-PSCs.

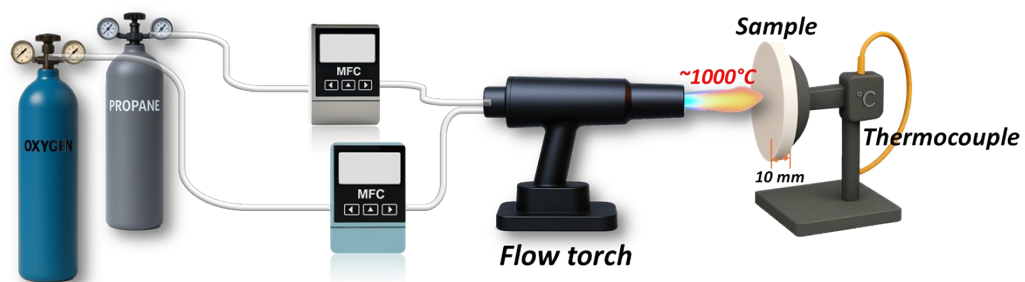

Fig. S7 Schematic diagram of oxy-propane ablation system.

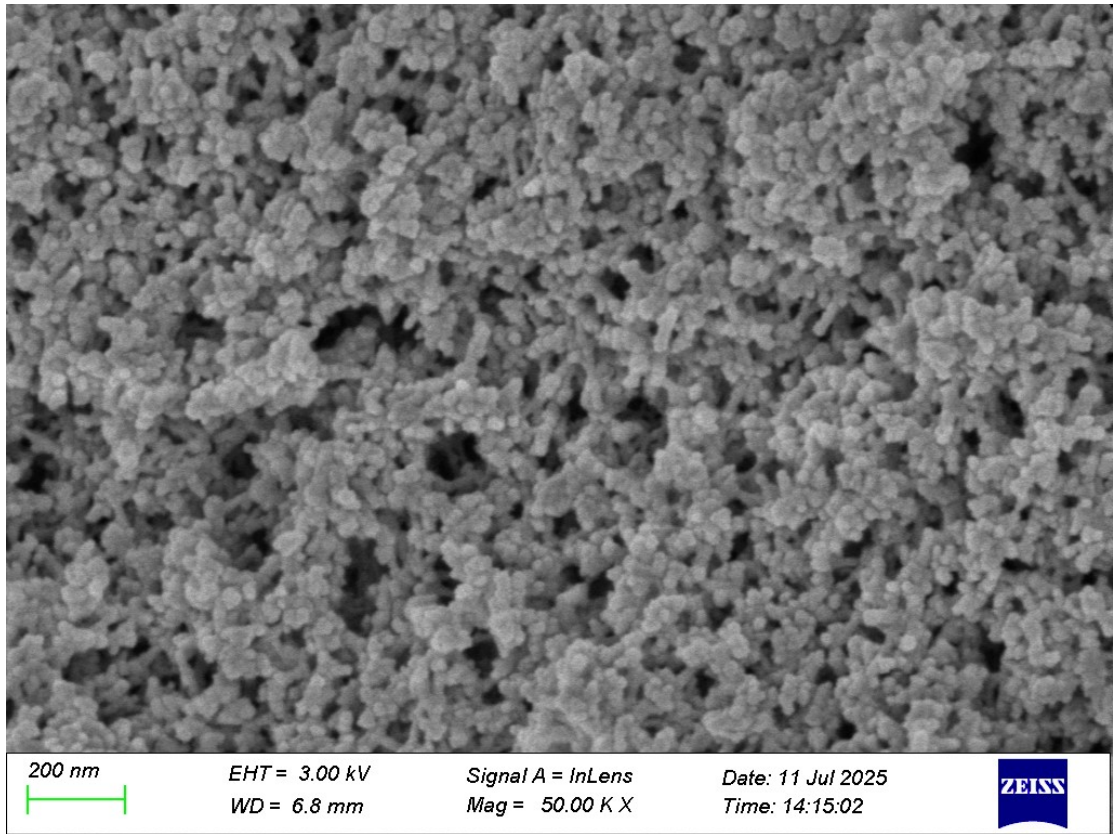

Fig. S8 SEM image of POSS-VPSC after the oxygen–propane flame ablation at 1000 °C.

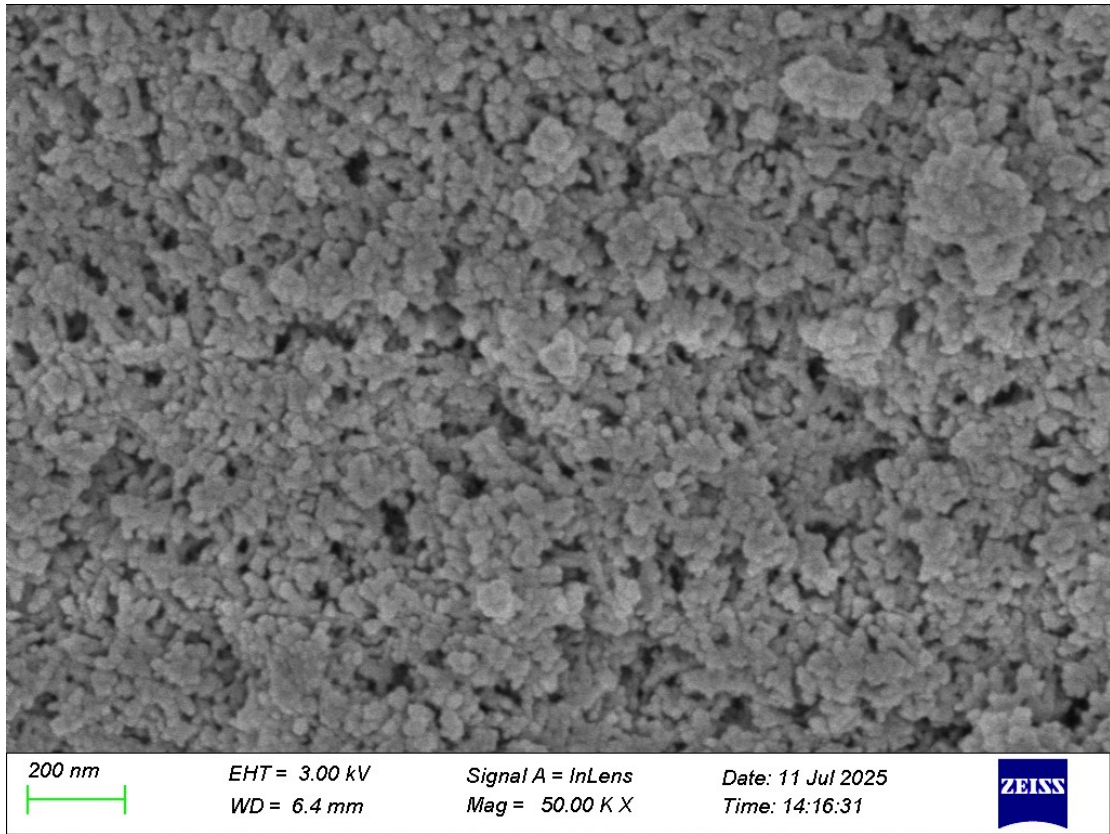

Fig. S9 SEM image of POSS-VPSC after the oxygen–propane flame ablation at 1400 °C.

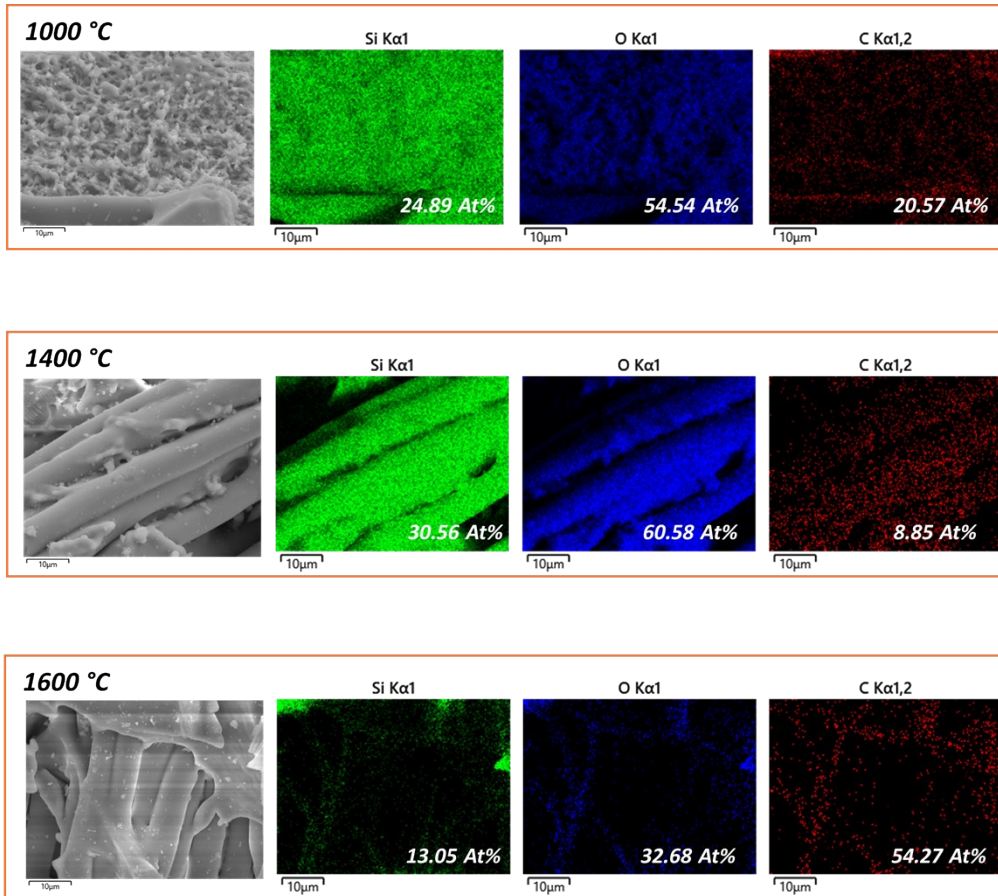

Fig. S10 SEM image and EDS elemental mappings of the POSS-VPSC composite surface after ablation at different temperatures.

**Table S1. Amount of Deionized Water for POSS-PSA Preparation with Various**

**POSS-SAEs**

| POSS-SAE  | Deionized Water<br>(g) |
|-----------|------------------------|
| POSS-VSAE | 0.61                   |
| POSS-PSAE | 0.56                   |
| POSS-MSAE | 0.63                   |

**Table S2. Typical physical properties of the aerogels**

| Sample    | Bulk density (g·cm <sup>-3</sup> ) | Volume shrinkage (%) | Mean pore diameter <sup>a</sup> (nm) | S <sub>BET</sub> <sup>b</sup> (m <sup>2</sup> /g) | Pore volume (cm <sup>3</sup> /g) | λ <sup>c</sup> (W·m <sup>-1</sup> ·K <sup>-1</sup> ) |
|-----------|------------------------------------|----------------------|--------------------------------------|---------------------------------------------------|----------------------------------|------------------------------------------------------|
| POSS-VPSA | 0.35                               | 5                    | 18.8                                 | 413                                               | 1.80                             | 0.036                                                |
| POSS-PPSA | 0.34                               | 4                    | 19.5                                 | 412                                               | 1.72                             | 0.035                                                |
| POSS-MPSA | 0.37                               | 8                    | 17.6                                 | 421                                               | 1.64                             | 0.038                                                |

<sup>a</sup>Mean pore diameter obtained from nitrogen adsorption branch via the Barrett–Joyner–Halenda method. <sup>b</sup>Brunauer–Emmett–Teller SSA obtained from nitrogen adsorption measurement. <sup>c</sup>Thermal conductivity at room temperature and ambient pressure.

**Table S3. Typical physical properties of the composites**

| Sample    | Bulk density<br>(g/cm <sup>3</sup> ) | Volume<br>shrinkage<br>(%) | Compressive<br>modulus<br>(MPa) | $\lambda^c$<br>(W·m <sup>-1</sup> ·K <sup>-1</sup> ) |
|-----------|--------------------------------------|----------------------------|---------------------------------|------------------------------------------------------|
| POSS-VPSC | 0.50                                 | 3                          | 55.5                            | 0.037                                                |
| POSS-PPSC | 0.49                                 | 2                          | 52.8                            | 0.036                                                |
| POSS-MPSC | 0.52                                 | 5                          | 58.4                            | 0.038                                                |

**Table S4 Detailed comparison of mechanical and thermal properties of various aerogels (corresponding to Fig. 4g)**

| Sample                                         | Bulk density (g/cm <sup>3</sup> ) | Compressive Strength (MPa) | Thermal Conductivity (W·m <sup>-1</sup> ·K <sup>-1</sup> ) | Test Conditions | Ref.      |
|------------------------------------------------|-----------------------------------|----------------------------|------------------------------------------------------------|-----------------|-----------|
| POSS-MPSA                                      | 0.37                              | 6.10                       | 0.038                                                      | RT <sup>a</sup> | This Work |
| MK/SiO <sub>2</sub> aerogel                    | 0.29                              | 3.24                       | 0.031                                                      | RT <sup>a</sup> | 2         |
| PMMS/PMDMS silicone aerogel                    | 0.42                              | 5.83                       | 0.052                                                      | RT <sup>a</sup> | 3         |
| SiO <sub>2</sub> NWs-reinforced silica aerogel | ~0.12                             | ~1.38 <sup>b</sup>         | 0.037                                                      | RT <sup>a</sup> | 4         |
| Chitosan/silica hybrid aerogel                 | 0.17                              | ~0.24 <sup>c</sup>         | 0.028                                                      | RT <sup>a</sup> | 5         |

<sup>a</sup> Room temperature; <sup>b</sup> Compressive stress recorded at 60% strain; <sup>c</sup> Compressive stress recorded at 5% strain

**Table S5 Detailed comparison of mechanical and thermal properties of various composites (corresponding to Fig. 5e)**

| Sample                                             | Fiber Content (wt%) | Bulk density (g/cm <sup>3</sup> ) | Tensile Strength (MPa) | Thermal Conductivity (W·m <sup>-1</sup> ·K <sup>-1</sup> ) | Test Conditions | Ref.      |
|----------------------------------------------------|---------------------|-----------------------------------|------------------------|------------------------------------------------------------|-----------------|-----------|
| POSS-MPSC                                          | 38.5                | 0.52                              | 27.8                   | 0.038                                                      | RT <sup>a</sup> | This Work |
| Silicone/ Quartz fiber composites                  | 40.0                | 0.50                              | 15.5                   | 0.039                                                      | RT <sup>a</sup> | 6         |
| Silicone/fibrous ceramic tile                      | 66.7                | 0.45                              | 3.6                    | 0.06                                                       | RT <sup>a</sup> | 7         |
| Fiber-reinforced alumina–silica aerogel composites | 38.5                | 0.39                              | 1.8                    | 0.039                                                      | RT <sup>a</sup> | 8         |
| Silicone/phenolic/ quartz/carbon hybrid fiber      | 57.6                | 0.33                              | 16.8                   | 0.062                                                      | RT <sup>a</sup> | 9         |
| SiO <sub>2</sub> /quartz fiber                     | 48.3                | 0.58                              | 4.3                    | 0.042                                                      | RT <sup>a</sup> | 10        |

<sup>a</sup> Room temperature

## Reference

- 1 H. Cai, B. Niu, Z. Qian, T. Li, P. Wang, L. Li, Y. Cao, Y. Zhang and D. Long, *Composites Science and Technology*, 2024, **245**, 110325.
- 2 L. Xu, W. Zhu, Z. Chen and D. Su, *ACS Appl. Mater. Interfaces*, 2023, **15**, 44238–44247.
- 3 Y. Luo, A. Yan, H. Tian, B. Niu, Y. Zhang, H. Wang and D. Long, *J. Mater. Chem.A*, 2024, **12**, 4684–4694.
- 4 L. Wang, W. Lian, B. Yin, X. Liu and S. Tang, *Ceram. Int.*, 2024, **50**, 6693–6702.
- 5 S. Zhang, Y. Liao, K. Lu, Z. Wang, J. Wang, L. Lai, W. Xin, Y. Xiao, S. Xiong and F. Ding, *Carbohydr. Polym.*, 2023, **320**, 121245.
- 6 H. Tian, Y. Luo, Z. Su, A. Yan, X. Liang, Y. Xing, B. Niu and D. Long, *Compos. Part A-appl. S.*, 2025, **198**, 109107.
- 7 H. Tian, X. Dong, B. Niu, Z. Su, A. Yan, X. Liang, Y. Xing, Y. Luo and D. Long, *Chem. Eng. J.*, 2025, 169346.
- 8 F. Peng, Y. Jiang, J. Feng, H. Cai, J. Feng and L. Li, *Chem. Eng. J.*, 2021, **411**, 128402.
- 9 X. Jin, C. Wu, H. Wang, Y. Pan, H. Huang, W. Wang, J. Fan, X. Yan, C. Hong and X. Zhang, *Compos. Sci. Technol.*, 2023, **232**, 109878.
- 10 K. Xu, C. Wu, Z. Chen, H. Liu, M. Li, L. Yang, S. Ai and S. Cui, *Ceram. Int.*, 2025, **51**, 2094–2103.
